# Supplementary material for: Changes in Alcohol Consumption during the COVID-19 Pandemic Are Dependent on Initial Consumption Level: Findings from Eight European Countries
Source: MDPI journal article supplement (doi:10.3390/ijerph181910547), 2021-10-08
Supplement: s1 [file s1]

**Supplementary material** for Ms: Changes in alcohol consumption during the COVID-19 pandemic are dependent on initial consumption level: Findings from eight European countries.

**Table S1A.** Overview of how qualitative responses to questions about changes in drinking frequency, usual quantity per occasion and heavy episodic drinking were translated into quantified measures of drinking frequency and usual quantity per occasion and quantity from heavy episodic drinking during the pandemic based on responses to questions on initial consumption (AUDIT-C, questions 1, 2 and 3) in main analyses and sensitivity analyses .

|                                    | Main analyses |               |           |               |           | Sensitivity analyses I |               |           |               |           | Sensitivity analyses II |               |           |               |           |
|------------------------------------|---------------|---------------|-----------|---------------|-----------|------------------------|---------------|-----------|---------------|-----------|-------------------------|---------------|-----------|---------------|-----------|
|                                    | Much less     | A little less | No change | A little more | Much more | Much less              | A little less | No change | A little more | Much more | Much less               | A little less | No change | A little more | Much more |
| <b>AUDIT-C question 1</b>          |               |               |           |               |           |                        |               |           |               |           |                         |               |           |               |           |
| Quantified change                  | -33%          | -9%           | 0         | +10%          | +50%      | -33%                   | -9%           | 0         | +10%          | +50%      | -50%                    | -13%          | 0         | +15%          | +100%     |
| Monthly or less = 6 <sup>a</sup>   | 4             | 5.5           | 6         | 6.6           | 9         | 4                      | 5.5           | 6         | 6.6           | 9         | 3                       | 5.2           | 6         | 6.9           | 12        |
| 2-4 times a month =40 <sup>a</sup> | 26            | 36            | 40        | 44            | 60        | 26                     | 36            | 40        | 44            | 60        | 20                      | 35            | 40        | 46            | 80        |
| 2-3 times/week =120 <sup>a</sup>   | 79            | 109           | 120       | 132           | 180       | 79                     | 109           | 120       | 132           | 180       | 60                      | 104           | 120       | 138           | 240       |
| 4 + times a week =250 <sup>a</sup> | 165           | 228           | 250       | 275           | 365       | 165                    | 228           | 250       | 275           | 365       | 125                     | 218           | 250       | 288           | 365       |
| <b>AUDIT-C question 2</b>          |               |               |           |               |           |                        |               |           |               |           |                         |               |           |               |           |
| Quantified change                  | -33%          | -9%           | 0         | +10%          | +50%      | -33%                   | -9%           | 0         | +10%          | +50%      | -50%                    | -13%          | 0         | +15%          | +100%     |
| 1 or 2 =1.5 <sup>b</sup>           | 1.0           | 1.4           | 1.5       | 1.7           | 2.3       | 1.0                    | 1.4           | 1.5       | 1.7           | 2.3       | 0.7                     | 1.3           | 1.5       | 1.7           | 3.0       |
| 3 or 4 =3.5 <sup>b</sup>           | 2.3           | 3.2           | 3.5       | 3.9           | 5.3       | 2.3                    | 3.2           | 3.5       | 3.9           | 5.3       | 1.8                     | 3.0           | 3.5       | 4.0           | 7.0       |
| 5 or 6 =5.5 <sup>b</sup>           | 3.6           | 5.0           | 5.5       | 6.1           | 8.3       | 3.6                    | 5.0           | 5.5       | 6.1           | 8.3       | 2.8                     | 4.8           | 5.5       | 6.3           | 11.0      |
| 7-9 =8.0 <sup>b</sup>              | 5.3           | 7.3           | 8.0       | 8.8           | 12.0      | 5.3                    | 7.3           | 8.0       | 8.8           | 12.0      | 4.0                     | 7.0           | 8.0       | 9.2           | 16.0      |
| 10 or more =12.0 <sup>b</sup>      | 7.9           | 10.9          | 12.0      | 13.2          | 18.0      | 7.9                    | 10.9          | 12.0      | 13.2          | 18.0      | 6.0                     | 10.4          | 12.0      | 13.8          | 24.0      |
| <b>AUDIT-C question 3</b>          |               |               |           |               |           |                        |               |           |               |           |                         |               |           |               |           |
| Quantified change                  | -33%          | -9%           | 0         | +10%          | +50%      |                        |               |           |               |           | -50%                    | -13%          | 0         | +15%          | +100%     |
| Less than monthly =6 <sup>c</sup>  | 4             | 5.5           | 6         | 6.6           | 9         |                        |               |           |               |           | 3                       | 5.2           | 6         | 6.9           | 12        |
| Monthly =15 <sup>c</sup>           | 10            | 13            | 15        | 17            | 22.5      |                        |               |           |               |           | 7.5                     | 13            | 15        | 17            | 30        |
| Weekly =50 <sup>c</sup>            | 35            | 45            | 50        | 55            | 75        |                        |               |           |               |           | 25                      | 45            | 50        | 55            | 100       |

|                    |                   |     |     |     |     |     |  |     |     |     |     |     |
|--------------------|-------------------|-----|-----|-----|-----|-----|--|-----|-----|-----|-----|-----|
| Daily/almost daily | =300 <sup>c</sup> | 200 | 270 | 300 | 330 | 365 |  | 150 | 270 | 300 | 330 | 365 |
|--------------------|-------------------|-----|-----|-----|-----|-----|--|-----|-----|-----|-----|-----|

<sup>a</sup> Given value for number of drinking occasions in the past 12 months;

<sup>b</sup> Given value for usual number of alcohol units per drinking occasion;

<sup>c</sup> Given value for number of heavy drinking occasions in the past 12 months

**Table S1B.** Sources for information about pandemic-related social measures, by country

|         | Links to information sources                                                                                                                                                                                                                                                                                                                                                                                                                                                                                                                                                                                                                                                                                                                                                                                                                                                                                                                                                                                                                                                                                                                                                                                                                                    |
|---------|-----------------------------------------------------------------------------------------------------------------------------------------------------------------------------------------------------------------------------------------------------------------------------------------------------------------------------------------------------------------------------------------------------------------------------------------------------------------------------------------------------------------------------------------------------------------------------------------------------------------------------------------------------------------------------------------------------------------------------------------------------------------------------------------------------------------------------------------------------------------------------------------------------------------------------------------------------------------------------------------------------------------------------------------------------------------------------------------------------------------------------------------------------------------------------------------------------------------------------------------------------------------|
| Czechia | <a href="https://www.vlada.cz/en/media-centrum/aktualne/measures-adopted-by-the-czech-government-against-coronavirus-180545/">https://www.vlada.cz/en/media-centrum/aktualne/measures-adopted-by-the-czech-government-against-coronavirus-180545/</a><br><a href="https://en.wikipedia.org/wiki/COVID-19_pandemic_in_the_Czech_Republic">https://en.wikipedia.org/wiki/COVID-19_pandemic_in_the_Czech_Republic</a>                                                                                                                                                                                                                                                                                                                                                                                                                                                                                                                                                                                                                                                                                                                                                                                                                                              |
| Denmark | <a href="https://www.garda.com/crisis24/news-alerts/324561/denmark-additional-domestic-restrictions-implemented-march-18-update-5">https://www.garda.com/crisis24/news-alerts/324561/denmark-additional-domestic-restrictions-implemented-march-18-update-5</a><br><a href="https://www.garda.com/crisis24/news-alerts/325961/denmark-lockdown-extended-until-april-13-due-to-covid-19-update-6">https://www.garda.com/crisis24/news-alerts/325961/denmark-lockdown-extended-until-april-13-due-to-covid-19-update-6</a><br><a href="https://www.garda.com/crisis24/news-alerts/325961/denmark-lockdown-extended-until-april-13-due-to-covid-19-update-6">https://www.garda.com/crisis24/news-alerts/325961/denmark-lockdown-extended-until-april-13-due-to-covid-19-update-6</a><br><a href="https://www.garda.com/crisis24/news-alerts/334566/denmark-health-ministry-to-lift-restrictions-on-public-gatherings-from-may-10-update-10">https://www.garda.com/crisis24/news-alerts/334566/denmark-health-ministry-to-lift-restrictions-on-public-gatherings-from-may-10-update-10</a><br><a href="https://www.reuters.com/article/us-health-coronavirus-denmark-idUSKBN22J2W2">https://www.reuters.com/article/us-health-coronavirus-denmark-idUSKBN22J2W2</a> |
| Finland | <a href="https://en.wikipedia.org/wiki/COVID-19_pandemic_in_Finland">https://en.wikipedia.org/wiki/COVID-19_pandemic_in_Finland</a><br><a href="https://blog.petrieflom.law.harvard.edu/2020/05/14/finland-global-responses-covid19/">https://blog.petrieflom.law.harvard.edu/2020/05/14/finland-global-responses-covid19/</a><br><a href="https://www.reuters.com/article/us-health-coronavirus-finland-idUSKBN22G2AB">https://www.reuters.com/article/us-health-coronavirus-finland-idUSKBN22G2AB</a>                                                                                                                                                                                                                                                                                                                                                                                                                                                                                                                                                                                                                                                                                                                                                         |
| Germany | <a href="https://www.bundesregierung.de/breg-de/leichte-sprache/22-maerz-2020-regeln-zum-corona-virus-1733310">https://www.bundesregierung.de/breg-de/leichte-sprache/22-maerz-2020-regeln-zum-corona-virus-1733310</a> .<br><a href="https://en.wikipedia.org/wiki/COVID-19_pandemic_in_Germany#March_2020">https://en.wikipedia.org/wiki/COVID-19_pandemic_in_Germany#March_2020</a><br><a href="https://www.statista.com/statistics/1105090/coronavirus-restaurant-visitation-impact-german/">https://www.statista.com/statistics/1105090/coronavirus-restaurant-visitation-impact-german/</a>                                                                                                                                                                                                                                                                                                                                                                                                                                                                                                                                                                                                                                                               |
| Norway  | <a href="https://www.regjeringen.no/en/topics/koronavirus-covid-19/timeline-for-news-from-norwegian-ministries-about-the-coronavirus-disease-covid-19/id2692402/">https://www.regjeringen.no/en/topics/koronavirus-covid-19/timeline-for-news-from-norwegian-ministries-about-the-coronavirus-disease-covid-19/id2692402/</a>                                                                                                                                                                                                                                                                                                                                                                                                                                                                                                                                                                                                                                                                                                                                                                                                                                                                                                                                   |
| Poland  | <a href="https://en.wikipedia.org/wiki/COVID-19_pandemic_in_Poland">https://en.wikipedia.org/wiki/COVID-19_pandemic_in_Poland</a><br><a href="https://study.gov.pl/news/easing-covid-19-restrictions-poland-may-1-what-will-be-changed">https://study.gov.pl/news/easing-covid-19-restrictions-poland-may-1-what-will-be-changed</a>                                                                                                                                                                                                                                                                                                                                                                                                                                                                                                                                                                                                                                                                                                                                                                                                                                                                                                                            |

|       |                                                                                                                                                                                                                                                                                                                                                                                                                |
|-------|----------------------------------------------------------------------------------------------------------------------------------------------------------------------------------------------------------------------------------------------------------------------------------------------------------------------------------------------------------------------------------------------------------------|
| Spain | <a href="https://en.wikipedia.org/wiki/COVID-19_pandemic_in_Spain">https://en.wikipedia.org/wiki/COVID-19_pandemic_in_Spain</a><br><a href="https://home.kpmg/xx/en/home/insights/2020/04/spain-government-and-institution-measures-in-response-to-covid.html">https://home.kpmg/xx/en/home/insights/2020/04/spain-government-and-institution-measures-in-response-to-covid.html</a>                           |
| UK    | <a href="https://en.wikipedia.org/wiki/Timeline_of_the_COVID-19_pandemic_in_the_United_Kingdom_(January%E2%80%93June_2020)">https://en.wikipedia.org/wiki/Timeline_of_the_COVID-19_pandemic_in_the_United_Kingdom_(January%E2%80%93June_2020)</a><br><a href="https://en.wikipedia.org/wiki/COVID-19_pandemic_in_the_United_Kingdom">https://en.wikipedia.org/wiki/COVID-19_pandemic_in_the_United_Kingdom</a> |

**Table S2A.** Changes in alcohol use by change indicator (change index and estimated change in volume of consumption) by initial consumption level and country.

|         | Alcohol consumption in units per week, mean (95% CI) |                                       |          |      |       | Change index score, mean (95% CI)     |          |      |       |
|---------|------------------------------------------------------|---------------------------------------|----------|------|-------|---------------------------------------|----------|------|-------|
|         | Initial level                                        | Change from initial level to pandemic |          |      |       | Change from initial level to pandemic |          |      |       |
|         |                                                      | Below 90                              | Above 90 |      |       | Below 90                              | Above 90 |      |       |
|         |                                                      | All                                   | pct      | pct  | p*    | All                                   | pct      | pct  | p *   |
| Czechia | 8.3                                                  | 0.9                                   | 0.4      | 6.2  | <.001 | -0.11                                 | -0.15    | 0.28 | <.001 |
| Denmark | 6.5                                                  | 0.3                                   | 0.0      | 2.4  | <.001 | -0.12                                 | -0.14    | 0.01 | .013  |
| Finland | 6.3                                                  | 0.2                                   | -0.1     | 4.3  | <.001 | -0.33                                 | -0.37    | 0.10 | <.001 |
| Germany | 6.9                                                  | 1.6                                   | 0.6      | 12.7 | <.001 | 0.05                                  | 0.0      | 0.68 | <.001 |
| Norway  | 5.5                                                  | 0.5                                   | 0.0      | 5.8  | <.001 | -0.19                                 | -0.24    | 0.32 | <.001 |
| Poland  | 6.8                                                  | 0.4                                   | 0.2      | 2.6  | <.001 | -0.15                                 | -0.18    | 0.28 | <.001 |
| Spain   | 6.0                                                  | 0.7                                   | -0.1     | 7.5  | <.001 | -0.34                                 | -0.41    | 0.29 | <.001 |
| UK      | 14.3                                                 | 4.9                                   | 2.8      | 19.6 | <.001 | 0.34                                  | 0.27     | 0.88 | <.001 |

**Note:** Sensitivity analysis: HED excluded from calculations of initial alcohol consumption and quantified change in alcohol consumption. The estimated change in consumption was constructed from questions about changes in drinking frequency and in usual amount per occasion and assumed changes relative to initial drinking behaviour, and the change was calculated in alcohol units per week. The change index was constructed from questions about changes in drinking frequency and in usual amount per occasion, and the score ranged from -1 to +1. \*F-test for difference in consumption change/index score change by initial consumption level (below vs above 90<sup>th</sup> percentile).

**Table S2B.** Changes in alcohol consumption (assuming larger relative changes) by initial consumption level and country.

|         | Change estimated alcohol consumption |              |              | P*    |
|---------|--------------------------------------|--------------|--------------|-------|
|         | All drinkers                         | Below 90 pct | Above 90 pct |       |
| Czechia | 1.3                                  | 0.5          | 9.4          | <.001 |
| Denmark | 0.3                                  | -0.1         | 3.6          | <.001 |
| Finland | 0.3                                  | -0.5         | 7.9          | <.001 |
| Germany | 2.6                                  | 0.8          | 21.6         | <.001 |
| Norway  | 0.8                                  | -0.1         | 9.7          | <.001 |
| Poland  | 0.5                                  | 0.2          | 2.9          | <.001 |
| Spain   | 1.1                                  | -0.2         | 12.8         | <.001 |
| UK      | 8.5                                  | 5.2          | 30.8         | <.001 |

**Note:** Sensitivity analysis: assuming a larger relative quantified change in drinking frequency, usual quantity per occasion and consumption from HED occasions. The estimated change in consumption was constructed from questions about changes in drinking frequency, in usual amount per occasion and HED frequency and assumed changes relative to initial drinking behaviour, and the change was calculated in alcohol units per week. \*F-test for difference in consumption change by initial consumption level (below vs above 90<sup>th</sup> percentile).

**Table S3A.** Estimated proportion exceeding 28 units per week initially and during the pandemic, by country.

|         | Initially | During pandemic |       |
|---------|-----------|-----------------|-------|
|         |           |                 | P*    |
| Czechia | 4.8       | 8.7             | <.001 |
| Denmark | 1.5       | 4.1             | <.001 |
| Finland | 2.7       | 4.6             | <.001 |
| Germany | 2.4       | 6.2             | <.001 |
| Norway  | 1.8       | 3.7             | <.001 |
| Poland  | 1.4       | 4.8             | <.001 |
| Spain   | 2.1       | 5.0             | <.001 |
| UK      | 15.9      | 21.1            | <.001 |

**Note:** Sensitivity analysis: HED excluded from calculations of initial alcohol consumption and quantified change in alcohol consumption. \*p-value for proportion test

**Table S3B.** Estimated proportion exceeding 28 units per week initially and during the pandemic, by country.

| Country | Initially | During<br>pandemic | P*    |
|---------|-----------|--------------------|-------|
| Czechia | 13.2      | 13.6               | .820  |
| Denmark | 3.1       | 6.4                | <.001 |
| Finland | 4.1       | 6.3                | <.001 |
| Germany | 6.8       | 11.5               | <.001 |
| Norway  | 3.2       | 5.1                | <.001 |
| Poland  | 4.4       | 8.2                | <.001 |
| Spain   | 5.4       | 8.4                | <.001 |
| UK      | 24.1      | 27.9               | <.001 |

Note: Sensitivity analysis: assuming a larger relative quantified change in drinking frequency, usual quantity per occasion and consumption from HED occasions.\*p-value for proportion test

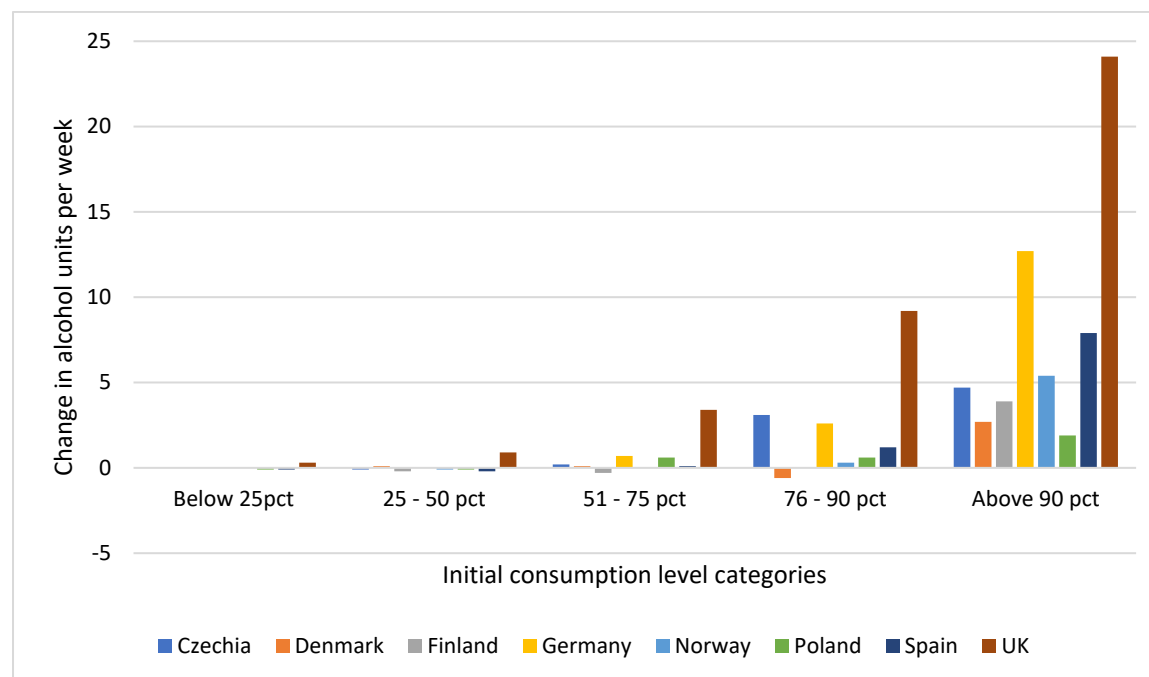

**Figure S1A.** Change in estimated volume of consumption by initial consumption level and country.

Sensitivity analysis: HED excluded from calculations of initial alcohol consumption and quantified change in alcohol consumption.

Note: Initial consumption categories are based on percentiles of the distribution in each country.

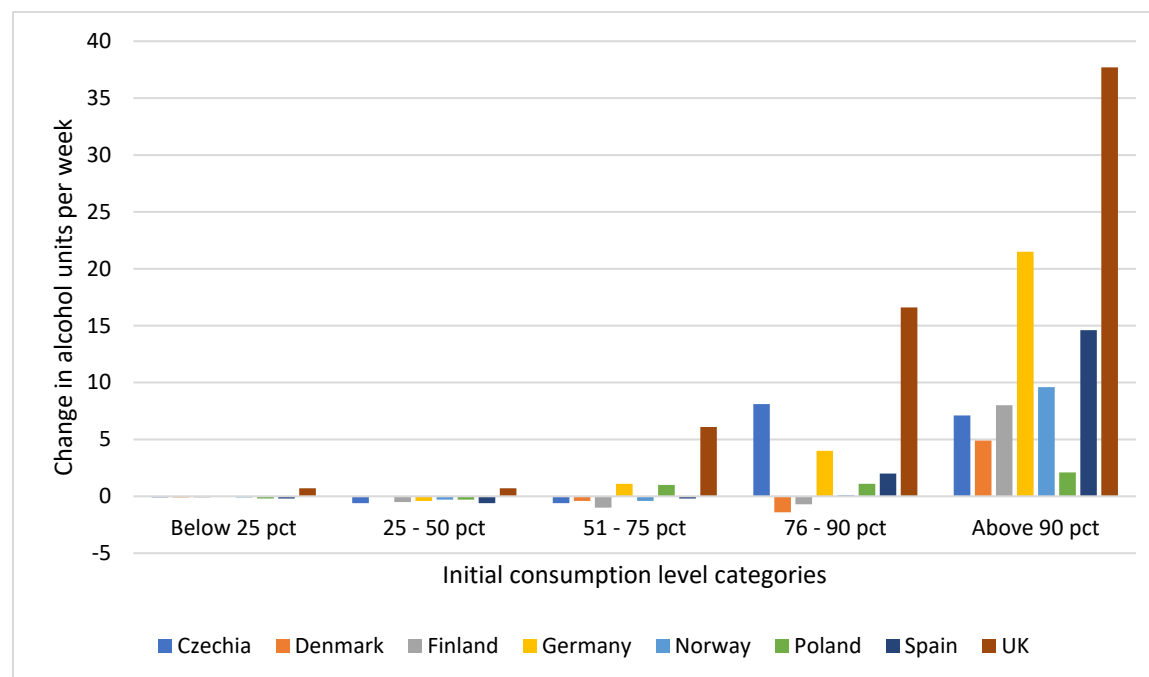

**Figure S1B.** Change in estimated volume of consumption by initial consumption level and country.

Sensitivity analysis: assuming a larger relative quantified change in drinking frequency, usual quantity per occasion and consumption from HED occasions.

Note: Initial consumption categories are based on percentiles of the distribution in each country.
